1 Title: Heparin Does Not Regulate Circulating Human PCSK9

2

3 Authors: Vivian Q. Xia<sup>1,2</sup>, Chui Mei Ong<sup>3,4</sup>, Lucas S. Zier<sup>1,2</sup>, John S. MacGregor<sup>1,2</sup>, Alan H. B.

4 Wu<sup>3,4</sup>, John S. Chorba<sup>\*,1,2</sup>

5

6 Affiliations:

7 <sup>1</sup>Division of Cardiology, Zuckerberg San Francisco General Hospital

8 <sup>2</sup>Department of Medicine, University of California San Francisco

9 <sup>3</sup>Clinical Chemistry Laboratory, Zuckerberg San Francisco General Hospital

10 <sup>4</sup>Department of Laboratory Medicine, University of California San Francisco

11

12 \* Correspondence to: [john.chorba@ucsf.edu](mailto:john.chorba@ucsf.edu)

13

14 Abstract

15 *Background:* PCSK9 chaperones the hepatic low-density lipoprotein receptor (LDLR) for  
16 lysosomal degradation, elevating serum LDL cholesterol and increasing the risk of  
17 atherosclerotic heart disease. Though the major effect on the hepatic LDLR comes from  
18 secreted PCSK9, the details of PCSK9 reuptake into the hepatocyte remain unclear. In both  
19 tissue culture and animal models, heparan sulfate proteoglycans (HSPGs) on hepatocytes act  
20 as co-receptors to promote PCSK9 reuptake. We hypothesized that if this PCSK9:HSPG  
21 interaction is important in humans, disrupting the interaction with unfractionated heparin (UFH)  
22 would acutely displace PCSK9 from the liver and increase plasma PCSK9.

23 *Methods:* We obtained remnant plasma samples from 160 subjects undergoing cardiac  
24 catheterization before and after administration of intravenous UFH. PCSK9 levels were  
25 determined using a commercial ELISA.

26 *Results:* Median plasma PCSK9 concentrations were 113 ng/ml prior to UFH and 119 ng/ml  
27 afterwards. This difference was not significantly different ( $p = 0.83$ , 95% CI of difference: -6.23  
28 to 6.31 ng/ml). Tests for equivalence provided 95% confidence that UFH administration would  
29 not raise PCSK9 levels by more than 4.7% of the baseline value. No predefined subgroups  
30 exhibited an effect of UFH on circulating PCSK9.

31 *Conclusion:* Administration of UFH does not result in a clinically meaningful effect on circulating  
32 PCSK9 in humans. These results suggest that disruption of the PCSK9:HSPG interaction does  
33 not affect PCSK9 reuptake into the liver. Further, they cast doubt on the clinical utility of  
34 disrupting the PCSK9:HSPG interaction as a therapeutic strategy for PCSK9 inhibition.

35

### 36 Graphical Abstract

37

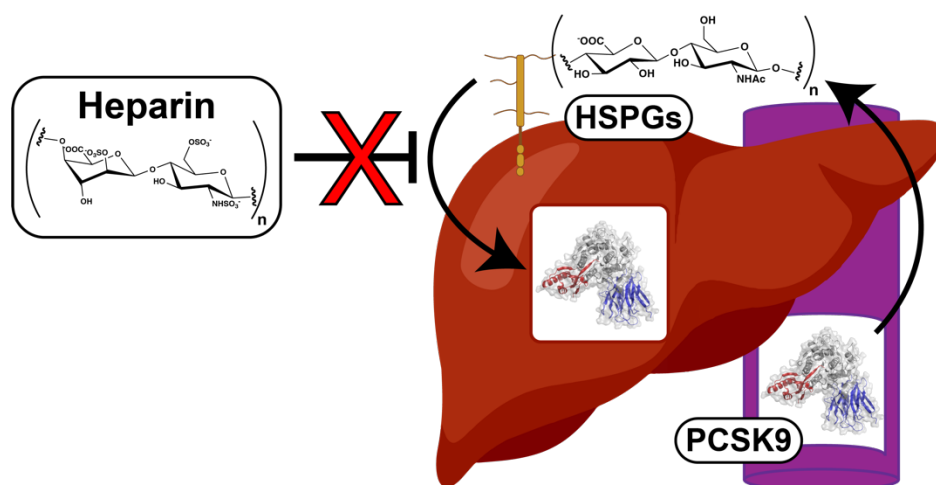

38

39

40

41 Clinical Perspective

42

43 *What is new?*

- 44
- 45 • Prior tissue culture and animal data suggest that PCSK9 interacts with hepatic heparan sulfate proteoglycans to enter the liver and raise cholesterol levels
  - 46 • We found no evidence that heparin, a competitive inhibitor of heparan sulfate proteoglycans, acutely affects PCSK9 in humans
- 47

48

49 *What are the clinical implications?*

- 50
- 51 • Heparin is unlikely to be successfully repurposed as a PCSK9 inhibitor
- 52

52 Main Text

53

54 PCSK9 chaperones the hepatic low-density lipoprotein receptor (LDLR) for lysosomal  
55 degradation, elevating serum LDL cholesterol and increasing the risk of atherosclerotic heart  
56 disease<sup>1</sup>. Though the major effect on the hepatic LDLR comes from secreted PCSK9<sup>2</sup>, the  
57 details of PCSK9 reuptake into the hepatocyte remain unclear. In both tissue culture and animal  
58 models, heparan sulfate proteoglycans (HSPGs) on hepatocytes bind to an arginine-rich region  
59 on the PCSK9 prodomain to promote PCSK9 reuptake<sup>3,4</sup>. However, to date, the PCSK9:HSPG  
60 interaction has not been directly evaluated in humans. We hypothesized that if this interaction is  
61 important, disrupting it with unfractionated heparin (UFH) would acutely displace PCSK9 from  
62 the liver and increase plasma PCSK9. We therefore leveraged remnant blood samples from  
63 patients undergoing cardiac catheterization and short-term anticoagulation with intravenous (IV)  
64 UFH in the Heparin Blockade of PCSK9 (“HepBlock9”) study (Fig. 1A). To our surprise, we  
65 observed no difference in circulating PCSK9 after UFH administration, suggesting that heparin  
66 is unlikely to be successfully repurposed for PCSK9 inhibition.

67  
68 In a protocol approved with a waiver of informed consent by the Institutional Review Board of  
69 the University of California, San Francisco (UCSF, CHR #18-26734), we targeted a sample size  
70 of 150 subjects for 80% power at  $\alpha = 0.05$  (two-tailed) to detect a 4 ng/ml (7%) change in  
71 PCSK9<sup>5</sup>. This was a conservative calculation given the 25% reduction in PCSK9 observed upon  
72 PCSK9:HSPG disruption in animal models<sup>3</sup>. We then collected 180 paired pre- and post-UFH  
73 remnant plasma samples, excluding 20 subjects for unclear records of UFH administration, a  
74 prolonged (> 8 hr) delay in sample collection, recent heparin use, or evidence of impaired liver  
75 function. This left us with 160 subjects available for analysis, who represented a predominantly  
76 male (69%) but ethnically diverse cohort (74% non-White) with the expected high prevalence of  
77 atherosclerosis (74%), statin use (70%), and obstructive coronary disease (40%).

78  
79 We then measured plasma PCSK9 concentrations using a commercial ELISA (Abcam)  
80 compatible with our collection strategy and reviewed the associated medical records. Median  
81 PCSK9 concentrations were 113 ng/ml prior to UFH and 119 ng/ml after, with no significant  
82 difference between the matched samples ( $p = 0.83$ , Fig. 1B&C). Equivalence testing provided  
83 95% confidence that the rise in PCSK9 from UFH was no more than 5.35 ng/ml, or 4.7% of the  
84 baseline. Because several homeostatic mechanisms regulate circulating PCSK9<sup>5</sup>, we also  
85 evaluated the effect of IV UFH on circulating PCSK9 after stratifying by sex, age, race, ethnicity,  
86 burden of atherosclerosis, presentation of acute coronary syndrome (ACS), statin use, non-HDL  
87 cholesterol, renal function, and UFH dose. However, we failed to identify any subgroup that  
88 displayed a significant response (Fig. 1D). We conclude from these data that administration of  
89 IV UFH does not raise PCSK9 concentrations acutely.

90  
91 We focused on bolus administration of UFH because the reported half-life of circulating PCSK9  
92 is only 5 minutes<sup>2</sup>. To assess whether longer UFH treatments are required to disrupt PCSK9

93 uptake, we compared baseline PCSK9 concentrations in our main cohort to the 12 subjects  
94 excluded because of prior treatment with heparin-like products, but found no significant  
95 difference ( $p = 0.24$ , Fig. 1E&F). We also measured PCSK9 concentrations in 22 separate  
96 patients anticoagulated with continuous IV UFH. Median PCSK9 concentrations in the paired  
97 samples were no different after either a 6 hr ( $p > 0.99$ , Fig. 1G) or 24 hr infusion ( $p = 0.55$ , Fig.  
98 1G). Because this cohort displayed a wide distribution of baseline PCSK9 concentrations, we  
99 also explored the effects on the fractional change in PCSK9 at both timepoints, but again found  
100 no significant difference ( $p = 0.97$  for 6 hrs,  $p = 0.18$  for 24 hrs, Fig. 1H).

101  
102 Together, our data support the null hypothesis: that administration of therapeutic UFH does not  
103 disrupt PCSK9 reuptake or affect circulating PCSK9 concentrations. Our results highlight the  
104 importance of assessing physiologic questions in humans to assess their clinical relevance,  
105 given the observations on the PCSK9:HSPG interaction in prior models<sup>3,4</sup>. The strengths of our  
106 study include 1) direct measurements in human subjects, without need for an experimental  
107 animal model, 2) the clinical relevance to potential drug repurposing, even if the answer is  
108 negative, 3) temporal observations to draw causal inferences, 4) the diverse ethnic population of  
109 our sample, improving the generalizability of our findings, and 5) the use of subjects as their  
110 own controls to minimize confounding from the substantial variability in PCSK9 concentrations  
111 among individuals. Our study is limited by 1) a reliance on static measurements, leaving us  
112 unable to directly assess PCSK9 kinetics or shifts between body compartments, 2) a sample  
113 size powered for our main hypothesis but not necessarily subgroup analyses, and 3) the focus  
114 on acute UFH administration, which limits our conclusions regarding long-term HSPG blockade.  
115 Given the relative infrequency of PCSK9 variants, we also cannot comment on the role of the  
116 PCSK9:HSPG interaction in certain genetic backgrounds, which may yet remain important<sup>4</sup>.

117

118 In conclusion, we found no evidence that heparin acutely interferes with PCSK9 uptake, casting  
119 doubt on the clinical utility of disrupting the PCSK9:HSPG interaction as a potential strategy to  
120 inhibit PCSK9 function.

121

122

123 *Acknowledgments:* We thank the UCSF cardiology fellows and nursing staff of the ZSFG  
124 cardiac catheterization laboratory for preservation of remnant samples.

125

126 *Funding:* This work was supported by the NIH/NHLBI (K08 HL124068, R03 HL145259, R01  
127 HL146404, and R01 HL159457), a Pfizer ASPIRE Cardiovascular Award, the Harris Fund, the  
128 Research Evaluation and Allocation Committee of the UCSF School of Medicine, all to J.S.C.

129

130 *Author contributions:* Overall study design: J.S.C; Supervision of preservation of remnant  
131 samples: L.S.Z, J.S.M.; Storage and processing of remnant samples: C.M.O, A.H.B.W.;  
132 Determination of PCSK9 concentrations: V.Q.X, J.S.C; Data analysis: V.Q.X, J.S.C; Manuscript  
133 preparation: J.S.C; Critical review and revision of the manuscript: All authors.

134

135 *Competing interests:* J.S.C. has received consulting fees from Gilde Healthcare and Eko.

136

137 *Data availability:* Additional data and materials requests are available from the corresponding  
138 author via material transfer agreement, subject to IRB review.

139

140

## 141 References

142

143 1. Seidah NG, Awan Z, Chrétien M, Mbikay M. PCSK9: A Key Modulator of Cardiovascular

- 144 Health. *Circ Res*. 2014;114(6):1022-1036. doi:10.1161/CIRCRESAHA.114.301621
- 145 2. Grefhorst A, McNutt MC, Lagace TA, Horton JD. Plasma PCSK9 preferentially reduces  
146 liver LDL receptors in mice. *J Lipid Res*. 2008. doi:10.1194/jlr.M800027-JLR200
- 147 3. Gustafsen C, Olsen D, Vilstrup J, et al. Heparan sulfate proteoglycans present PCSK9 to  
148 the LDL receptor. *Nat Commun*. 2017;8(1):503. doi:10.1038/s41467-017-00568-7
- 149 4. Galvan AM, Chorba JS. Cell-associated heparin-like molecules modulate the ability of  
150 LDL to regulate PCSK9 uptake. *J Lipid Res*. 2019;60(1):71-84. doi:10.1194/jlr.M087189
- 151 5. Lakoski SG, Lagace T a, Cohen JC, Horton JD, Hobbs HH. Genetic and metabolic  
152 determinants of plasma PCSK9 levels. *J Clin Endocrinol Metab*. 2009;94(7):2537-2543.  
153 doi:10.1210/jc.2009-0141

154

155

156

157

158

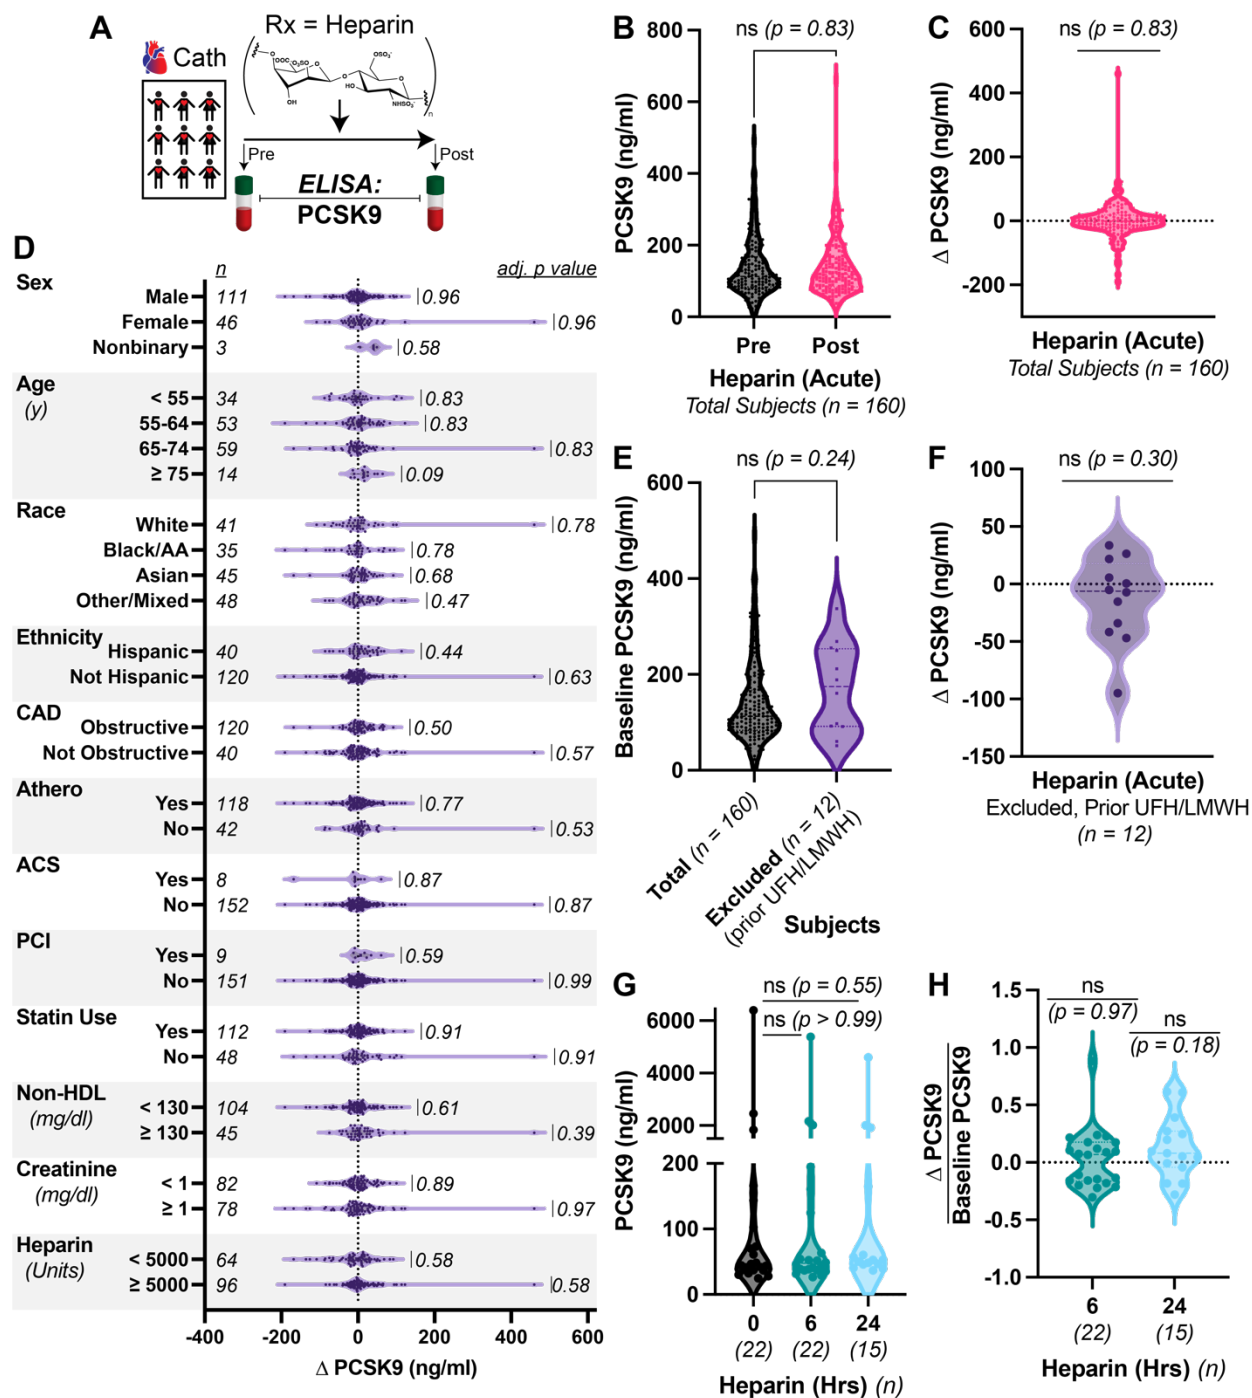

159

160

161 **Figure 1: HepBlock9 Study.** A) Schematic of study. Remnant blood samples before and after

162 heparin administration in subjects undergoing cardiac catheterization were tested for PCSK9

163 concentrations. B) Plasma PCSK9 concentrations in study subjects before (black) and after



164 (pink) IV UFH administration. C) Difference in plasma PCSK9 concentrations before and after IV  
165 UFH in total subjects. Source data is the same as from B. D) Difference in plasma PCSK9  
166 concentrations before and after IV UFH in subjects stratified by sex, age, race, ethnicity,  
167 obstructive CAD, atherosclerosis, ACS presentation, percutaneous coronary intervention (PCI),  
168 statin use, serum non-HDL cholesterol, serum creatinine, or heparin dose. E) Baseline (pre-  
169 UFH) plasma PCSK9 concentrations in study subjects (after exclusions, black) and subjects  
170 excluded due to prior UFH or low-molecular-weight heparin (LMWH) administration (purple).  
171 Mann-Whitney test shown. F) Difference in PCSK9 concentrations before and after IV UFH in  
172 subjects excluded due to prior UFH or LMWH administration. G) Plasma PCSK9 concentrations  
173 before (black) or after 6 (teal) or 24 (light blue) hr infusions of IV UFH. Note the discontinuous Y  
174 axis. H) Fractional difference in plasma PCSK9 concentrations before and after IV UFH  
175 infusions. Source data is the same as from G. *All panels*) Unless otherwise noted, Wilcoxon  
176 signed-rank tests shown, comparing matched-pairs between groups or to a hypothetical median  
177 of 0, with Holm-Sidak corrections for multiple hypothesis testing when appropriate.  $n$  = number  
178 of subjects in each group, ns = non-significant at adjusted  $p > 0.05$ .
